# Supplementary material for: Mitochondrial Metabolism in the Spotlight: Maintaining Balanced RNAP III Activity Ensures Cellular Homeostasis
Source: MDPI journal article supplement (doi:10.3390/ijms241914763), 2023-09-29

# Supplementary data

**Table S1. The amino acids isotopomers percentage (%) pool in the wild-type (WT), *maf1-Δ* and *rpc128-1007* yeast cells grown in a rich medium supplemented with either 2 % [1,2-<sup>13</sup>C]-glucose (A, B) or 2 % [U-<sup>13</sup>C]-glycerol (C) after a temperature shift to 37°C for 1 h (D). Yeast overnight (o/n) cultures were pre-cultivated in YPGly medium (B, C, D). For the glucose labelling experiment of *maf1-Δ* and reference yeast strain (WT), overnight cells cultures were grown in YPD medium (A). The results are shown as an average percentage value from three independent biological replicates (mean) with standard deviations (SD). Zero stands for the incorporation of <sup>12</sup>C and 1 indicates <sup>13</sup>C-labelling.**

A.

| 2 % glucose (o/n culture 2 % glucose) |            |          |      |               |      |
|---------------------------------------|------------|----------|------|---------------|------|
| Amino acid                            | Isotopomer | WT       |      | <i>maf1-Δ</i> |      |
|                                       |            | Mean [%] | SD   | Mean [%]      | SD   |
| Alanine                               | 0 0 0      | 89,20    | 0.81 | 89,82         | 3.0  |
|                                       | 0 1 1      | 10.15    | 0.82 | 9.19          | 2.5  |
|                                       | 0 0 1      | 0.63     | 0.25 | 0.97          | 0.46 |
| Glutamate                             | 0 0 0 0 0  | 82.60    | 0.28 | 83.30         | 0.30 |
|                                       | 0 0 0 1 1  | 7.15     | 0.05 | 6.94          | 0.10 |
|                                       | 1 1 0 0 0  | 0.30     | 0.01 | 0.37          | 0.05 |
|                                       | 0 0 1 0 0  | 0,06     | 0.00 | 0.35          | 0.04 |
|                                       | 0 1 1 0 0  | 7.46     | 0.18 | 6.72          | 0.08 |
|                                       | 0 1 1 1 1  | 2.44     | 0.02 | 2.30          | 0.03 |
| Aspartate                             | 0 0 0 0    | 69.78    | 5.36 | 73.14         | 3.39 |
|                                       | 0 0 1 1    | 0.0085   | 0.01 | 0.012         | 0.0  |
|                                       | 0 1 1 0    | 34.09    | 5.35 | 26.84         | 3.39 |

B.

| 2 % glucose (o/n culture 2 % glycerol) |             |          |      |                    |      |
|----------------------------------------|-------------|----------|------|--------------------|------|
| Amino acid                             | Isotopomer  | WT       |      | <i>rpc128-1007</i> |      |
|                                        |             | Mean [%] | SD   | Mean [%]           | SD   |
| Alanine                                | 0 0 0       | 93.63    | 1.54 | 90.30              | 1.30 |
|                                        | 0 1 1       | 5.75     | 1.28 | 8.61               | 0.95 |
|                                        | 0 0 1       | 0.61     | 0.27 | 1.08               | 0.37 |
| Glutamate                              | 0 0 0 0 0   | 81.92    | 0.18 | 84,70              | 0.46 |
|                                        | 0 0 0 1 1 1 | 8,09     | 0.48 | 6.76               | 0,33 |
|                                        | 1 1 0 0 0   | 0.95     | 0.06 | 0.32               | 0.04 |
|                                        | 0 0 1 0 0   | 0.59     | 0.11 | 0.00               | 0.00 |
|                                        | 0 1 1 0     | 6.34     | 0.27 | 6.11               | 0.10 |
|                                        | 0 1 1 1 1   | 2.08     | 0.16 | 2.08               | 0.09 |
| Aspartate                              | 0 0 0 0     | 78,69    | 3.38 | 77,86              | 0.80 |
|                                        | 0 0 1 1     | 0.05     | 0.0  | 0.08               | 0.03 |
|                                        | 0 1 1 0     | 21.29    | 3.36 | 22.05              | 0.15 |

C.

| 2 % glycerol (o/n culture 2 % glycerol) |            |          |       |               |      |                   |      |
|-----------------------------------------|------------|----------|-------|---------------|------|-------------------|------|
| Amino acid                              | Isotopomer | WT       |       | <i>mafI-Δ</i> |      | <i>rpl28-1007</i> |      |
|                                         |            | Mean [%] | SD    | Mean [%]      | SD   | Mean [%]          | SD   |
| Alanine                                 | 0 0 0      | 73.60    | 5.94  | 76.33         | 0.29 | 68,63             | 9.45 |
|                                         | 1 1 1      | 23.91    | 5.32  | 19.63         | 8.59 | 29.13             | 8.59 |
|                                         | 1 1 0      | 0.25     | 0.054 | 0.79          | 0.00 | 0.39              | 0.16 |
|                                         | 1 1 0      | 0.42     | 0.09  | 1.38          | 0.28 | 0.50              | 0.11 |
|                                         | 0 0 1      | 1.80     | 0.47  | 1.84          | 0.14 | 1.98              | 1.19 |
| Glutamate                               | 0 0 0 0 0  | 77.95    | 1.42  | 88,24         | 0.19 | 76.79             | 1.32 |
|                                         | 0 0 0 1 1  | 6.57     | 0.59  | 5.37          | 0.17 | 6.63              | 0.26 |
|                                         | 1 1 0 0 0  | 5.67     | 0.44  | 3.59          | 0.25 | 6.52              | 0.37 |
|                                         | 0 0 1 0 0  | 1.15     | 0.12  | 0.22          | 0.11 | 1.07              | 0.25 |
|                                         | 1 1 1 0 0  | 5.58     | 0.58  | 1.76          | 0.14 | 5.24              | 0.28 |
|                                         | 0 1 1 1 1  | 2.01     | 0.58  | 0.76          | 0.04 | 2.04              | 0.12 |
|                                         | 1 1 1 1 1  | 1.47     | 0.48  | 0.00          | 0.00 | 1.63              | 0.06 |
| Aspartate                               | 0 0 0 0    | 89.30    | 2.27  | 88.69         | 4.59 | 92.68             | 1.89 |
|                                         | 1 1 0 0    | 2.69     | 1.27  | 7.74          | 0.85 | 2.39              | 1.60 |
|                                         | 0 0 1 1    | 2.91     | 1.08  | 3.15          | 0.63 | 1.61              | 0.08 |
|                                         | 1 1 1 0    | 2.59     | 0.61  | 1.14          | 0.17 | 1.38              | 0.30 |
|                                         | 0 1 1 1    | 0.61     | 0.55  | 1.30          | 0.23 | 1.92              | 0.58 |

D.

| 2 % glycerol, 1 h shift to 37°C (o/n culture 2 % glycerol) |            |          |      |               |      |
|------------------------------------------------------------|------------|----------|------|---------------|------|
| Amino acid                                                 | Isotopomer | WT       |      | <i>mafI-Δ</i> |      |
|                                                            |            | Mean [%] | SD   | Mean [%]      | SD   |
| Glutamate                                                  | 0 0 0 0 0  | 70.85    | 0.83 | 81.97         | 0.50 |
|                                                            | 0 0 0 1 1  | 8.42     | 0.33 | 6.86          | 0.62 |
|                                                            | 1 1 0 0 0  | 6.93     | 0.27 | 4.62          | 0.53 |
|                                                            | 0 0 1 0 0  | 1.33     | 0.37 | 1.56          | 0.52 |
|                                                            | 1 1 1 0 0  | 7.18     | 0.28 | 1.96          | 1.09 |
|                                                            | 0 1 1 1 1  | 2.91     | 0.12 | 1.38          | 0.21 |
|                                                            | 1 1 1 1 1  | 2.35     | 0.10 | 1.03          | 0.50 |
| Aspartate                                                  | 0 0 0 0    | 82.03    | 1.52 | 88.04         | 0.83 |
|                                                            | 1 1 0 0    | 4.98     | 1.03 | 4.35          | 0.76 |
|                                                            | 0 0 1 1    | 4.45     | 0.18 | 3.82          | 0.46 |
|                                                            | 1 1 1 0    | 4.88     | 0.19 | 2.14          | 0.47 |
|                                                            | 0 1 1 1    | 3.62     | 0.14 | 1.63          | 0.16 |

**Table S2.** Reaction fluxes modified in delta\_maf1FBA model. Abbreviations: LB- lower bound, UB- upper bound

| Reaction ID | LB  | UB  | Gene   | Function                                                                                                                                                 |
|-------------|-----|-----|--------|----------------------------------------------------------------------------------------------------------------------------------------------------------|
| R_04490.0   | 0.0 | 0.1 | FBP1   | Fructose-1,6-bisphosphatase, key regulatory enzyme in gluconeogenesis                                                                                    |
| R_11340.0   | 0.0 | 0.1 | HXT6&7 | High affinity glucose transporter                                                                                                                        |
| R_11390.0   | 0.0 | 0.1 | HXT6&7 | High affinity glucose transporter                                                                                                                        |
| R_11660.0   | 0.0 | 0.1 | HXT6&7 | High affinity glucose transporter                                                                                                                        |
| R_09890.0   | 0.0 | 0.1 | LYS9   | Saccharopine dehydrogenase, the seventh step in lysine biosynthesis, exhibits genetic and physical interaction with TRM12 (involved in tRNA methylation) |
| R_05490.0   | 0.0 | 0.1 | MET2   | L-homoserine-O-acetyltransferase, the first step of the methionine biosynthesis                                                                          |
| R_08840.0   | 0.0 | 0.1 | PCK1   | Phosphoenolopyruvate carboxykinase, key enzyme in gluconeogenesis                                                                                        |

**Table S3.** FVA and FBA simulation results indicating increased activity of Pda1 (the PDH complex subunit) in delta\_maf1FBA model. Delta\_maf1FBA model represents *maf1Δ* metabolism, the consensus Yeast7.6 model represents metabolism of the WT strain. Abbreviations: LB- lower bound, UB- upper bound, FBA- Flux Balance Analysis, FVA- Flux Variability Analysis.

| strain       | Reaction in the model | LB  | UB       |
|--------------|-----------------------|-----|----------|
| glucose      |                       |     |          |
| WT           | R_PDA1                | 0.0 | 4.0      |
| <i>maf1Δ</i> | R_PDA1                | 0.0 | 3.07831  |
| glycerol     |                       |     |          |
| WT           | R_PDA1                | 0.0 | 2.0      |
| <i>maf1Δ</i> | R_PDA1                | 0.0 | 0.929155 |
| galactose    |                       |     |          |
| WT           | R_PDA1                | 0.0 | 4.0      |
| <i>maf1Δ</i> | R_PDA1                | 0.0 | 3.07831  |

| strain       | Reaction in the model | FBA         |
|--------------|-----------------------|-------------|
| glucose      |                       |             |
| WT           | R_PDA1                | 2.01943e-13 |
| <i>maf1Δ</i> | R_PDA1                | 1.67712     |
| glycerol     |                       |             |
| WT           | R_PDA1                | 0.0         |
| <i>maf1Δ</i> | R_PDA1                | 0.755131    |
| galactose    |                       |             |
| WT           | R_PDA1                | 0.0         |
| <i>maf1Δ</i> | R_PDA1                | 1.75513     |

**Figure S1. Lipid droplets in the strains.**

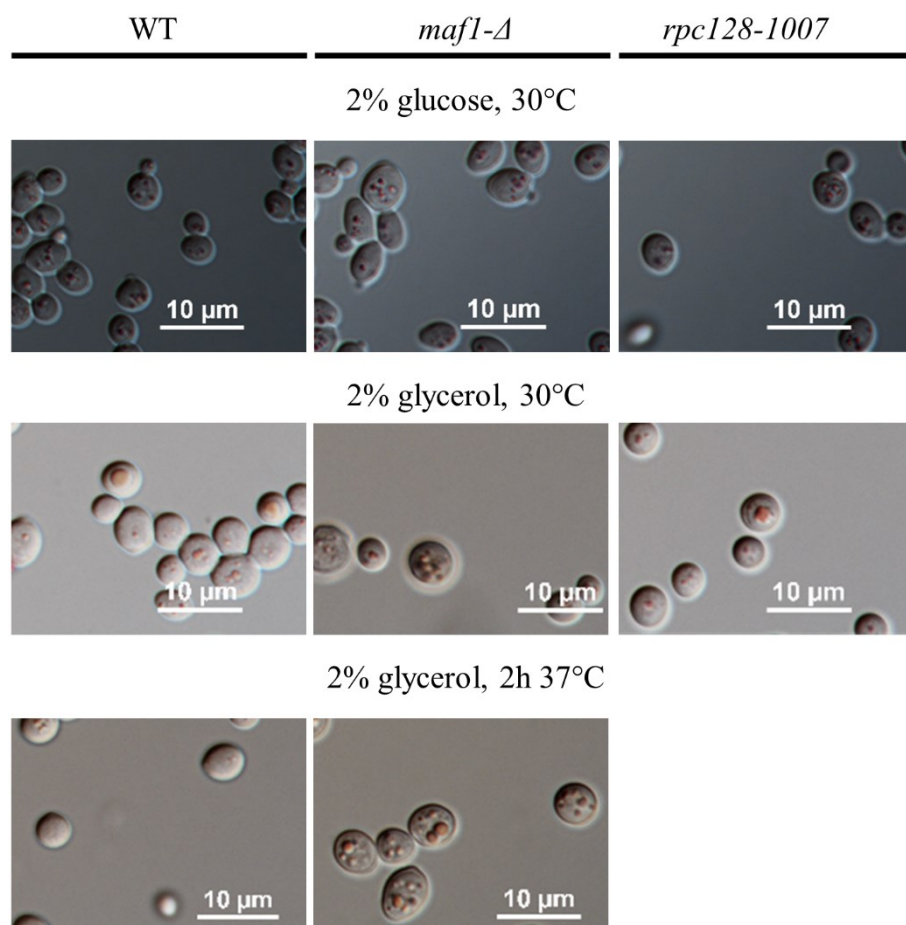

Supplement: s1 [file s1]
